# Supplementary material for: Phylogenomic Characterization of Ranavirus Isolated from Wild Smallmouth Bass (Micropterus dolomieu)
Source: MDPI journal article supplement (doi:10.3390/v16050715), 2024-04-30
Supplement: s1 [file s1]

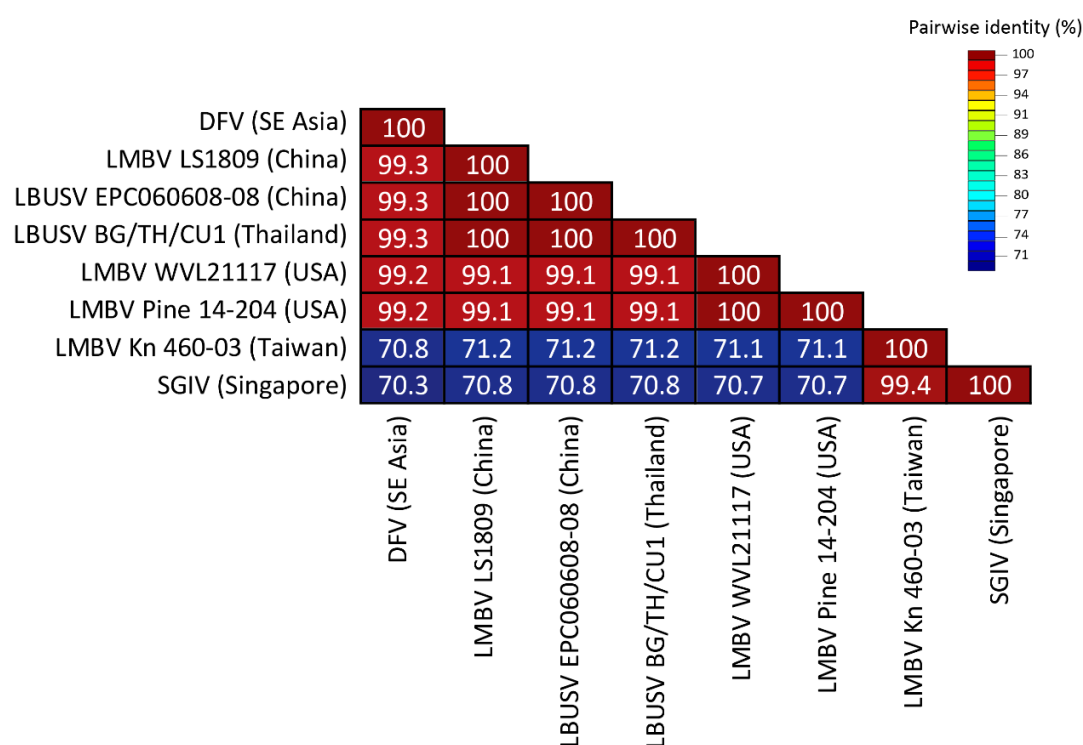

**Figure S1** Genetic comparison of the nucleotide sequence of the major capsid protein of largemouth bass virus (LMBV) isolate WVL21117 to representative LMBV isolates and Singapore grouper iridovirus. LMBV isolates Alleghany 12-343, 12-342, 15-232, SC95, 130903 were identical to LMBV-WVL21117, LMBV isolates BG/TH/CU2, BG/TH/CU3, XJ1808, CZ1809, YA1604, GS1708 were identical to EPC060608-08, and guppy virus 6 is identical to doctor fish virus; hence, they were excluded from the genetic analysis. Values are expressed as a percentage of nucleotide identity. See Table S1 for virus abbreviations.

**Table S1.** Virus species, isolates names, abbreviations, and GenBank accession numbers of the ranaviruses used in the phylogenetic and genetic analyses.

| <b>Virus species</b>                           | <b>Isolate name (abbreviation)</b>                                     | <b>GenBank accession number</b> |
|------------------------------------------------|------------------------------------------------------------------------|---------------------------------|
| <i>Frog virus 3</i>                            | Frog virus 3 (FV3)                                                     | AY548484                        |
|                                                | Frog virus 3 isolate SSME (SSME)                                       | KJ175144                        |
|                                                | Soft-shelled turtle iridovirus (STIV)                                  | EU627010                        |
|                                                | Rana grylio iridovirus (RGV)                                           | JQ654586                        |
|                                                | Tiger frog virus (TFV)                                                 | AF389451                        |
|                                                | Bohle iridovirus (BIV)                                                 | KX185156                        |
|                                                | German gecko ranavirus (GGRV)                                          | KP266742                        |
|                                                | Tortoise ranavirus isolate (ToRV1)                                     | KP266743                        |
| <i>Common midwife toad virus</i>               | Common midwife toad virus (CMTV-E)                                     | JQ231222                        |
|                                                | Common midwife toad virus (CMTV-NL)                                    | KP056312                        |
|                                                | Testudo hermanni ranavirus (THRV-CH8/96)                               | KP266741                        |
|                                                | Andrias davidianus ranavirus (ADRV)                                    | KC865735                        |
| <i>European North Atlantic ranavirus</i>       | Pike-perch iridovirus (PPIV)                                           | KX574341                        |
|                                                | Lumpfish ranavirus isolate F24-15 (LMRV-F24-15)                        | MH665358                        |
|                                                | Lumpfish ranavirus isolate F140-16 (LMRV-F140-16)                      | MH665359                        |
|                                                | Lumpfish ranavirus isolate V4955 (LMRV-V4955)                          | MH665360                        |
|                                                | Ranavirus maximus (Rmax)                                               | KX574343                        |
| <i>Ambystoma tigrinum virus</i>                | Cod iridovirus (CoIV)                                                  | KX574342                        |
|                                                | Ambystoma tigrinum virus (ATV)                                         | AY150217                        |
| <i>Epizootic haematopoietic necrosis virus</i> | Epizootic haematopoietic necrosis virus (EHNV)                         | FJ433873                        |
|                                                | European catfish virus (ECV)                                           | KT989885                        |
|                                                | European sheatfish virus (ESV)                                         | JQ724856                        |
|                                                | Largemouth bass virus isolate WVL21117 (LMBV-WVL21117)                 |                                 |
| <i>Santee-Cooper ranavirus</i>                 | Largemouth bass virus isolate Alleghany 12-343 (LMBV-Alleghany 12-343) | MK681855                        |
|                                                | Largemouth bass virus isolate Pine 14-204 (LMBV-Pine 14-204)           | MK681856                        |
|                                                | Largemouth bass virus isolate 12-342 (LMBV-12-342)*                    | KY825779                        |
|                                                | Largemouth bass virus isolate 15-232 (LMBV-15-232)*                    | KY825781                        |
|                                                | Largemouth bass virus isolate 130903 (LMBV-130903)*                    | KY825782                        |
|                                                | Largemouth bass virus isolate Santee-Cooper Reservoir (LMBV- SC95)*    | FR682503                        |

|                                             |                                                                                          |          |
|---------------------------------------------|------------------------------------------------------------------------------------------|----------|
|                                             | Largemouth bass virus isolate LS1809 (LMBV-LS1809)*                                      | MK836315 |
|                                             | Largemouth bass virus isolate CZ1809 (LMBV-CZ1809)*                                      | MK836316 |
|                                             | Largemouth bass virus isolate XJ1808 (LMBV-XJ1808)*                                      | MK836317 |
|                                             | Largemouth bass virus isolate GS1708 (LMBV-GS1708)*                                      | MK836318 |
|                                             | Largemouth bass virus isolate YA1604 (LMBV-YA1604)*                                      | MK836319 |
|                                             | Largemouth bass ulcerative syndrome virus isolate<br>EPC060608-08 (LBUSV- EPC060608-08)* | GU256635 |
|                                             | Santee-Cooper ranavirus isolate BG/TH/CU1(LBUSV-<br>BG/TH/CU1)*                          | KU507315 |
|                                             | Santee-Cooper ranavirus isolate BG/TH/CU1(LBUSV-<br>BG/TH/CU2)*                          | KU507316 |
|                                             | Santee-Cooper ranavirus isolate BG/TH/CU1(LBUSV-<br>BG/TH/CU3)*                          | KU507317 |
|                                             | Doctorfish virus (DFV)*                                                                  | FR677324 |
|                                             | Guppy virus 6 (GV6)*                                                                     | FR677325 |
| <i>Singapore<br/>grouper<br/>iridovirus</i> | Singapore grouper iridovirus (SGIV)                                                      | AY521625 |
|                                             | Grouper iridovirus (GIV)                                                                 | AY666015 |
|                                             | Largemouth bass virus isolate Kn 460-03 (LMBV-Kn 460-<br>03)*                            | JF264364 |
| Unclassified                                | Short-finned eel ranavirus (SERV)                                                        | KX353311 |

---

\*Used only in MCP gene analysis

**Table S2.** Summary of the genome annotations of the largemouth bass virus isolate WVL21117.

| <b>ORF</b>      | <b>Position in the genome</b> | <b>Product size (amino acid)</b> | <b>Predicted function</b>                                      |
|-----------------|-------------------------------|----------------------------------|----------------------------------------------------------------|
| 1 <sup>#</sup>  | 1-762                         | 253                              | Replication factor                                             |
| 2 <sup>#</sup>  | 807-1700                      | 297                              | Hypothetical protein                                           |
| 3               | 1747-1959                     | 70                               | Hypothetical protein                                           |
| 4 <sup>#</sup>  | 1992-4859                     | 955                              | D5 family NTPase/ATPase                                        |
| 5*              | 4981-6672                     | 563                              | Hypothetical protein                                           |
| 6 <sup>#</sup>  | 6697-7368                     | 223                              | Hypothetical protein                                           |
| 7*              | 7423-7956                     | 177                              | Hypothetical protein                                           |
| 8               | 7956-8729                     | 257                              | Hypothetical protein                                           |
| 9               | 8737-9459                     | 240                              | Hypothetical protein                                           |
| 10              | 9492-10013                    | 173                              | Hypothetical protein                                           |
| 11              | 10058-10534                   | 158                              | Hypothetical protein                                           |
| 12              | 10633-11379                   | 248                              | Hypothetical protein                                           |
| 13              | 11499-11978                   | 159                              | Hypothetical protein                                           |
| 14              | 11989-14862                   | 957                              | Tyrosine kinase                                                |
| 15              | 14952-15764                   | 270                              | eIF-2 alpha-like protein                                       |
| 16*             | 15808-16113                   | 101                              | Hypothetical protein                                           |
| 17              | 16195-17589                   | 464                              | ATPase-dependent protease                                      |
| 18 <sup>#</sup> | 17633-18790                   | 385                              | Ribonuclease III                                               |
| 19 <sup>#</sup> | 18820-19095                   | 91                               | Transcription elongation factor SII                            |
| 20              | 19158-19601                   | 147                              | Immediate early protein ICP-18                                 |
| 21              | 19662-20252                   | 196                              | Hypothetical protein                                           |
| 22              | 20358-20936                   | 192                              | Hypothetical protein                                           |
| 23              | 20921-21583                   | 220                              | Cytosine DNA methyltransferase                                 |
| 24              | 21649-22224                   | 191                              | Tumor necrosis factor receptor                                 |
| 25 <sup>#</sup> | 22304-23815                   | 503                              | Myristylated membrane protein                                  |
| 26*             | 23839-24012                   | 57                               | Hypothetical protein                                           |
| 27              | 24084-25148                   | 354                              | 3-beta-hydroxy-delta 5-C27 steroid oxidoreductase-like protein |
| 28              | 25217-26341                   | 374                              | Hypothetical protein                                           |
| 29              | 26461-27249                   | 262                              | Hypothetical protein                                           |
| 30*             | 27719-28027                   | 102                              | Hypothetical protein                                           |
| 31              | 28359-28808                   | 149                              | Hypothetical protein                                           |
| 32              | 28828-29187                   | 119                              | Hypothetical protein                                           |
| 33              | 29290-29478                   | 62                               | Hypothetical protein                                           |
| 34              | 29532-31397                   | 621                              | Neurofilament triplet H1-like protein                          |
| 35              | 31412-31837                   | 141                              | Hypothetical protein                                           |
| 36*             | 31878-32042                   | 54                               | Hypothetical protein                                           |

|                 |             |      |                                              |
|-----------------|-------------|------|----------------------------------------------|
| 37*             | 32079-32840 | 253  | Hypothetical protein                         |
| 38              | 32867-34081 | 404  | Hypothetical protein                         |
| 39              | 34108-34980 | 290  | Hypothetical protein                         |
| 40 <sup>#</sup> | 34986-36050 | 354  | Myristylated membrane protein                |
| 41 <sup>#</sup> | 36134-37282 | 382  | Immediate early protein ICP-46               |
| 42 <sup>#</sup> | 37395-38786 | 463  | Major capsid protein                         |
| 43              | 38900-40072 | 390  | Hypothetical protein                         |
| 44 <sup>#</sup> | 40078-40521 | 147  | Thiol oxidoreductase                         |
| 45              | 40555-42339 | 594  | Hypothetical protein                         |
| 46              | 42422-43150 | 242  | Proliferating cell nuclear antigen           |
| 47              | 43202-43771 | 189  | Deoxynucleoside kinase                       |
| 48              | 43841-44239 | 132  | Hypothetical protein                         |
| 49 <sup>#</sup> | 44261-47110 | 949  | NTPase                                       |
| 50 <sup>#</sup> | 47128-47745 | 205  | Putative NIF/NLI interacting factor          |
| 51              | 47785-48024 | 79   | Hypothetical protein                         |
| 52              | 48116-49804 | 562  | Ribonucleotide reductase alpha subunit       |
| 53*             | 49868-50188 | 106  | Hypothetical protein                         |
| 54              | 50247-50522 | 91   | Hypothetical protein                         |
| 55 <sup>#</sup> | 50576-54064 | 1162 | Hypothetical protein                         |
| 56              | 54134-54493 | 119  | Hypothetical protein                         |
| 57 <sup>#</sup> | 54460-55407 | 315  | AAA-ATPase                                   |
| 58              | 55620-56465 | 281  | Hypothetical protein                         |
| 59              | 56549-58060 | 503  | Hypothetical protein                         |
| 60              | 58093-58434 | 113  | Hypothetical protein                         |
| 61              | 58136-60775 | 879  | Serine/threonine protein kinase              |
| 62              | 60803-61237 | 144  | Hypothetical protein                         |
| 63              | 61288-62988 | 566  | Hypothetical protein                         |
| 64*             | 63061-64785 | 574  | Hypothetical protein                         |
| 65*             | 64826-65047 | 73   | Hypothetical protein                         |
| 66              | 65087-65497 | 136  | Hypothetical protein                         |
| 67*             | 65531-66232 | 233  | Neurofilament triplet H1-like protein        |
| 68              | 66278-66688 | 136  | Hypothetical protein                         |
| 69              | 66743-67546 | 267  | Hypothetical protein                         |
| 70 <sup>#</sup> | 68083-68547 | 154  | Hypothetical protein                         |
| 71 <sup>#</sup> | 68616-69686 | 356  | Putative DNA repair protein RAD2             |
| 72 <sup>#</sup> | 69730-73014 | 1094 | DNA-dependent RNA Polymerase II beta subunit |
| 73              | 73078-73614 | 178  | Hypothetical protein                         |
| 74              | 73694-74407 | 237  | Tumor necrosis factor receptor               |
| 75              | 74507-74932 | 141  | dUTPase                                      |
| 76              | 74995-75270 | 91   | Caspase recruitment domain protein           |

|                 |             |      |                                                                                                          |
|-----------------|-------------|------|----------------------------------------------------------------------------------------------------------|
| 77              | 75388-76551 | 387  | Ribonucleoside reductase beta subunit                                                                    |
| 78              | 76600-77121 | 173  | Hypothetical protein                                                                                     |
| 79              | 77143-77859 | 238  | Hypothetical protein                                                                                     |
| 80 <sup>#</sup> | 77919-80933 | 1004 | DNA polymerase                                                                                           |
| 81              | 80993-81541 | 182  | Hypothetical protein                                                                                     |
| 82              | 81608-82723 | 371  | Hypothetical protein                                                                                     |
| 83              | 82790-83416 | 208  | Hypothetical protein                                                                                     |
| 84              | 83466-83687 | 73   | Hypothetical protein                                                                                     |
| 85              | 83746-84003 | 85   | Putative LITAF/PIG7 possible membrane-associated motif in LPS-induced Tumor Necrosis Factor Alpha factor |
| 86              | 84052-85185 | 377  | Hypothetical protein                                                                                     |
| 87              | 85212-86429 | 405  | Hypothetical protein                                                                                     |
| 88              | 86549-87523 | 324  | NTPase/helicase-like protein                                                                             |
| 89              | 87620-88270 | 216  | Hypothetical protein                                                                                     |
| 90              | 88357-88596 | 79   | Hypothetical protein                                                                                     |
| 91              | 88604-88975 | 123  | Hypothetical protein                                                                                     |
| 92 <sup>*</sup> | 89026-89226 | 66   | Hypothetical protein                                                                                     |
| 93              | 89400-89921 | 173  | Hypothetical protein                                                                                     |
| 94 <sup>#</sup> | 89981-91459 | 492  | Phosphotransferase                                                                                       |
| 95              | 91468-91878 | 136  | Hypothetical protein                                                                                     |
| 96              | 92073-93278 | 401  | Helicase-like Protein                                                                                    |
| 97              | 92925-93335 | 136  | Hypothetical protein                                                                                     |
| 98 <sup>#</sup> | 93595-97659 | 1354 | DNA-dependent RNA Polymerase II alpha subunit                                                            |
| 99              | 98073-98753 | 226  | Hypothetical protein                                                                                     |
| 100             | 98756-99271 | 171  | Bcl-2 family apoptosis regulator protein                                                                 |

---

\*ORFs unique to *Santee-Cooper ranavirus*

#iridovirus core genes
